# Supplementary material for: Immunogenicity of the Two mRNA SARS-CoV-2 Vaccines in a Large Cohort of Dialysis Patients
Source: Infect Dis Rep. 2022 Nov 24;14(6):946–54. doi: 10.3390/idr14060093 (PMC9778780; doi:10.3390/idr14060093)
Supplement: Supplementary file 1 [file idr-14-00093-s001.zip › Supplementary Data S1.xlsx]

## Sheet: Φύλλο1
id	Birthdate	age	hemoage	Country_birth	Gender	Tx1	Vaccine_type	1stdose	2nddose	date_of_meas	anti	pain_after_1st_dose	headache_after_1st_dose	fatigue_after_1st_dose	muscle_pain_after_1st_dose	fever_after_1st_dose	Skin-rash_after_1st_dose	other__after_1st_dose	pain_after_2nd_dose	headache_after_2nd_dose	fatigue_after_2nd_dose	muscle_pain_after_2nd_dose	fever_after_2nd_dose	Skin-rash_after_2nd_dose	other__after_2nd_dose
1	1962-01-20	59.2361	58.0278	Greece	Male	2020-01-30	Pfizer/Biontech	2021-04-15	2021-05-06	2021-05-28	6.8	No	No	No	No	No	No	No	No	No	No	No	No	No	No
2	1953-04-17	67.9796	54.1148	Greece	Male	2007-05-29	Pfizer/Biontech	2021-04-09	2021-05-05	2021-06-04	31.2	No	No	No	No	No	No	No	No	No	No	No	No	No	No
3	1966-03-15	55.0265	54.8595	Other	Female	2021-01-22	Pfizer/Biontech	2021-03-24	2021-04-17	2021-05-12	13.7	Yes	No	No	No	No	No	No	Yes	No	No	No	Yes	No	No
4	1947-09-28	73.5868	73.4006	Greece	Male	2021-02-20	Pfizer/Biontech	2021-04-29	2021-05-19	2021-07-01	10.8	No	No	No	No	No	No	No	No	No	No	No	No	No	No
5	1955-05-15	65.9343	61.4661	Greece	Female	2016-10-31	Pfizer/Biontech	2021-04-20	2021-05-15	2021-06-30	40.8	Yes	No	No	No	No	No	No	Yes	No	No	No	No	No	No
6	1950-05-20	70.8899	68.5299	Greece	Male	2018-11-29	Pfizer/Biontech	2021-04-09	2021-05-05	2021-06-03	31.4	No	No	No	No	No	No	No	No	No	No	No	No	No	No
7	1968-03-04	53.0552	52.0038	Greece	Male	2020-03-05	Pfizer/Biontech	2021-03-24	2021-04-14	2021-05-11	13	Yes	No	No	No	No	No	No	Yes	No	No	No	No	No	No
8	1950-08-22	70.6353	64.3573	Greece	Female	2014-12-30	Pfizer/Biontech	2021-04-10	2021-05-08	2021-05-25	6.8	No	No	No	No	No	No	No	No	No	No	No	No	No	No
9	1951-12-26	69.2883	66.4271	Greece	Male	2018-05-30	Pfizer/Biontech	2021-04-09	2021-05-04	2021-06-01	14.7	Yes	No	No	No	No	No	No	No	No	No	No	No	No	No
10	1953-10-07	67.4949	66.0767	Greece	Male	2019-11-04	Pfizer/Biontech	2021-04-05	2021-04-26	2021-05-25	29.2	Yes	No	No	No	No	No	No	No	No	No	No	No	No	No
11	1951-02-10	70.1179	66.8543	Greece	Male	2017-12-18	Pfizer/Biontech	2021-03-24	2021-04-14	2021-05-11	31.5	No	No	No	No	No	No	No	No	No	No	No	No	No	No
12	1951-07-31	69.7345	48.9155	Other	Male	2000-06-29	Pfizer/Biontech	2021-04-24	2021-05-23	2021-06-20	6.8	Yes	No	No	No	No	No	No	Yes	No	No	No	No	No	No
13	1948-03-15	73.1241	69.8714	Greece	Female	2018-01-27	Pfizer/Biontech	2021-04-29	2021-05-20	2021-07-01	7.9	No	No	No	No	No	No	No	No	No	No	No	No	No	No
14	1943-10-04	77.5184	75.6484	Greece	Female	2019-05-28	Pfizer/Biontech	2021-04-10	2021-05-04	2021-06-04	6.8	No	No	No	No	No	No	No	No	No	No	No	No	No	No
15	1947-10-21	73.5046	70.2109	Greece	Male	2018-01-05	Pfizer/Biontech	2021-04-22	2021-05-14	2021-06-17	6.8	No	No	No	No	No	No	No	Yes	No	No	No	No	No	No
16	1953-01-29	68.1767	61.7618	Greece	Male	2014-11-03	Pfizer/Biontech	2021-04-03	2021-04-24	2021-05-19	6.8	No	No	No	No	No	No	No	No	No	No	No	No	No	No
17	1952-08-06	68.6777	65.1787	Greece	Female	2017-10-10	Pfizer/Biontech	2021-04-10	2021-05-04	2021-06-03	6.8	Yes	Yes	No	No	No	No	No	Yes	Yes	Yes	No	No	No	No
